# Supplementary material for: A prognostic long non-coding RNA-associated competing endogenous RNA network in head and neck squamous cell carcinoma
Source: PeerJ. 2020 Sep 15;8:e9701. doi: 10.7717/peerj.9701 (PMC7500352; doi:10.7717/peerj.9701)
Supplement: Supplemental Information 6 [file peerj-08-9701-s006.xlsx]

## Sheet: Sheet1
	NORMAL			HN4			HN6			HN30			CAL27			SCC9			SCC25
HOTTIP	32.9172	32.6161	31.6049	29.0943	28.9206	28.8634	29.6716	29.8788	29.3906	30.3123	29.8092	29.926	30.9577	30.516	30.7065	30.4728	30.5382	30.4926	28.8658	28.3768	28.324
GAPDH	17.8818	17.6634	17.5655	20.0438	20.1705	20.0144	15.4316	15.9433	15.4276	15.625	15.547	15.4752	14.4791	14.4085	14.7662	18.5352	18.6073	18.3831	16.1438	16.101	16.2452
average(GAPDH)	17.7036			20.0762			15.6008			15.5491			14.5513			18.5086			16.1633
ΔCт	15.2136	14.9125	13.9014	9.01811	8.84437	8.78723	14.0707	14.278	13.7898	14.7633	14.2601	14.377	16.4065	15.9647	16.1552	11.9642	12.0297	11.9841	12.7025	12.2135	12.1606
average(ΔCт)	14.6758			14.6758			14.6758			14.6758			14.6758			14.6758			14.6758
ΔΔCт	0	0	0	-5.65769	-5.83143	-5.88858	-0.605061	-0.397788	-0.885981	0.0874545	-0.415727	-0.29885	1.73067	1.28893	1.4794	-2.71157	-2.64613	-2.69175	-1.97333	-2.4623	-2.51517
2ΔΔCт	1	1	1	50.4819	56.9424	59.2433	1.52104	1.31749	1.84802	0.941182	1.33397	1.23016	0.301313	0.409254	0.358638	6.55032	6.25985	6.46098	3.92674	5.51095	5.71665
	NORMAL			HN4			HN6			HN30			CAL27			SCC9			SCC25
linc00460	34.2811	35.0528	34.4556	30.1751	29.9373	29.9526	27.6258	27.6376	27.9076	29.8066	29.7633	29.9782	29.5578	29.6176	29.1373	30.3766	30.4247	30.2696	29.389	30.334	30.739
GAPDH	17.4442	17.7372	17.9948	19.9662	19.8727	19.938	15.1949	15.3873	15.5501	15.4576	15.6173	15.4652	13.9791	14.3725	14.365	18.4167	18.6638	18.3011	16.5642	16.4763	16.1546
average(GAPDH)	17.7254			19.9256			15.3774			15.5134			14.2389			18.4605			16.3983
ΔCт	16.5557	17.3274	16.7302	10.2494	10.0117	10.027	12.2484	12.2601	12.5302	14.2932	14.25	14.4649	15.319	15.3788	14.8985	11.9161	11.9642	11.8091	12.9907	13.9357	14.3406
average(ΔCт)	16.8711			16.8711			16.8711			16.8711			16.8711			16.8711			16.8711
ΔΔCт	0	0	0	-6.6217	-6.85946	-6.84415	-4.62271	-4.61099	-4.34096	-2.5779	-2.62117	-2.40623	-1.55215	-1.49234	-1.97264	-4.95502	-4.90691	-5.06205	-3.88044	-2.93545	-2.53047
2ΔΔCт	1	1	1	98.4761	116.119	114.893	24.6362	24.437	20.2656	5.97069	6.15248	5.30088	2.93253	2.81345	3.92484	31.0176	30.0004	33.4063	14.7275	7.64995	5.77762
	NORMAL			HN4			HN6			HN30			CAL27			SCC9			SCC25
miR-206	25.9629	26.1099	26.6618	28.5196	28.3539	28.3485	26.9043	27.2418	27.4862	30.0959	29.9539	30.1647	28.5456	27.9781	28.7	25.1757	25.0684	25.3989	25.933	25.7288	25.9856
GAPDH	17.3616	17.7615	18.0672	20.2586	20.0998	20.5508	15.3434	15.4072	15.2617	15.3866	14.9685	15.4258	14.7153	14.4162	14.4326	18.2615	18.7858	18.7792	16.0879	16.2537	16.0613
average(GAPDH)	17.7301			20.3031			15.3374			15.2603			14.5214			18.6088			16.1343
ΔCт	8.23276	8.37982	8.93174	8.21657	8.05081	8.04544	11.5669	11.9043	12.1488	14.8356	14.6936	14.9044	14.0243	13.4567	14.1787	6.56688	6.4596	6.79014	9.79866	9.59449	9.85126
average(ΔCт)	8.51477			8.51477			8.51477			8.51477			8.51477			8.51477			8.51477
ΔΔCт	0	0	0	-0.298199	-0.463963	-0.469334	3.0521	3.38956	3.63398	6.32078	6.17886	6.38962	5.50949	4.94197	5.66389	-1.94789	-2.05517	-1.72464	1.28388	1.07971	1.33649
2ΔΔCт	1	1	1	1.22961	1.37933	1.38447	0.120566	0.0954203	0.0805496	0.0125099	0.0138032	0.011927	0.0219522	0.0325326	0.0197242	3.85811	4.15592	3.30497	0.410688	0.473122	0.395982
